# Supplementary material for: Temporal Trends and Outcome of Patients with Acute Coronary Syndrome and Prior Myocardial Infarction
Source: MDPI journal article supplement (doi:10.3390/jcm10235580), 2021-11-27
Supplement: s1 [file s1]

**Table S4:** Baseline characteristics of patients with prior MI admitted with STEMI vs NSTEMI-ACS compared between time periods (early 2000-2008 vs late 2010-2018)

|                                           | STEMI          |               |         | NSTEMI-ACS      |                |         |
|-------------------------------------------|----------------|---------------|---------|-----------------|----------------|---------|
|                                           | Early<br>n=983 | Late<br>n=711 | P value | Early<br>n=1838 | Late<br>n=1780 | P value |
| Age (years)                               | 64.7 ±12.8     | 64.7 ±12.1    | 0.963   | 67.6 ±12.4      | 67.5 ±11.9     | 0.771   |
| Gender (male)                             | 790 (80.4)     | 613 (86.2)    | 0.002   | 1450 (78.9)     | 1459 (82.0)    | 0.022   |
| Dyslipidemia                              | 648 (65.9)     | 611 (85.9)    | <0.001  | 1400 (76.2)     | 1597 (89.7)    | <0.001  |
| Hypertension                              | 563 (57.3)     | 532 (74.8)    | <0.001  | 1287 (70.0)     | 1493 (83.9)    | <0.001  |
| Active Smoker                             | 386 (39.3)     | 314 (44.2)    | 0.049   | 418 (22.7)      | 582 (32.7)     | <0.001  |
| Diabetes mellitus                         | 384 (39.1)     | 317 (44.6)    | 0.026   | 799 (43.5)      | 962 (54.0)     | <0.001  |
| Prior CABG                                | 127 (12.9)     | 91 (12.8)     | 1.000   | 570 (31.0)      | 463 (26.0)     | 0.001   |
| Prior PCI                                 | 541 (55.0)     | 614 (86.4)    | <0.001  | 1096 (59.6)     | 1458 (81.9)    | <0.001  |
| Chronic kidney disease                    | 113 (11.5)     | 93 (13.1)     | 0.363   | 405 (22.0)      | 371 (20.8)     | 0.405   |
| PVD                                       | 129 (13.1)     | 80 (11.3)     | 0.280   | 301 (16.4)      | 232 (13.0)     | 0.005   |
| Stroke/TIA                                | 110 (11.3)     | 79 (11.1)     | 0.985   | 401 ( 7.1)      | 351 ( 5.9)     | 0.006   |
| History of heart failure                  | 138 (14.0)     | 95 (13.4)     | 0.743   | 209 (11.5)      | 228 (12.8)     | 0.243   |
| <b>Baseline medications</b>               |                |               |         |                 |                |         |
| Aspirin                                   | 581 (77.2)     | 512 (75.1)    | 0.388   | 1296 (84.5)     | 1361 (80.8)    | 0.007   |
| P <sub>2</sub> Y <sub>12</sub> inhibitors | 78 (10.4)      | 122 (18.9)    | <0.001  | 278 (18.2)      | 507 (31.4)     | <0.001  |
| ACE-I/ARB                                 | 184 (48.9)     | 361 (58.7)    | <0.001  | 446 (61.5)      | 1107 (73.4)    | <0.001  |
| Beta blockers                             | 384 (51.1)     | 376 (59.6)    | 0.002   | 1028 (67.4)     | 1150 (70.9)    | 0.037   |
| Statins                                   | 419 (55.8)     | 461 (73.4)    | <0.001  | 1047 (68.7)     | 1361 (85.2)    | <0.001  |

\* Values are presented as number (%) or mean  $\pm$  standard deviation.

ACE-I-angiotensin-converting enzyme inhibitor; ARB- angiotensin receptor blocker; CABG- coronary artery bypass graft; NSTEMI-ACS- non-ST elevation acute coronary syndrome; PCI- percutaneous coronary; PVD- peripheral vascular disease; STEMI-ST elevation MI; TIA- transient ischemic attack
