# Supplementary material for: Temporal Trends and Outcome of Patients with Acute Coronary Syndrome and Prior Myocardial Infarction
Source: MDPI journal article supplement (doi:10.3390/jcm10235580), 2021-11-27
Supplement: s1 [file s1]

**Table S3:** prior MI vs No prior MI according to STEMI vs NSTEMI-ACS

|                                           | Prior MI             |                 |            | No prior MI          |                 |         |
|-------------------------------------------|----------------------|-----------------|------------|----------------------|-----------------|---------|
|                                           | NSTEMI-ACS<br>n=3618 | STEMI<br>n=1694 | P<br>value | NSTEMI-ACS<br>n=5621 | STEMI<br>n=5993 | P value |
| Age (years)                               | 67.6 ±12.2           | 64.7±12.5       | <0.001     | 64.1 ±12.8           | 61.3± 13.2      | <0.001  |
| Gender (male)                             | 2909 (80.4)          | 1403 (82.8)     | 0.039      | 4071 (72.4)          | 4684 (78.2)     | <0.001  |
| Dyslipidemia                              | 2997 (82.8)          | 1259 (74.3)     | <0.001     | 3635 (64.7)          | 3101 (51.7)     | <0.001  |
| Hypertension                              | 2780 (76.8)          | 1095 (64.6)     | <0.001     | 3439 (61.3)          | 2744 (45.9)     | <0.001  |
| Active Smoker                             | 1000 (27.6)          | 700 (41.3)      | <0.001     | 1838 (32.9)          | 2773 (46.4)     | <0.001  |
| Diabetes mellitus                         | 1761 (48.7)          | 701 (41.4)      | <0.001     | 2006 (35.7)          | 1633 (27.2)     | <0.001  |
| Prior CABG                                | 1033 (28.6)          | 218 (12.9)      | <0.001     | 331 (5.9)            | 79 (1.3)        | <0.001  |
| Prior PCI                                 | 2554 (70.6)          | 1155 (68.2)     | 0.076      | 792 (14.1)           | 276 (4.6)       | <0.001  |
| Chronic kidney disease                    | 776 (21.4)           | 206 (12.2)      | <0.001     | 554 (9.9)            | 311 (5.2)       | <0.001  |
| PVD                                       | 533 (14.7)           | 209 (12.3)      | 0.021      | 405 (7.2)            | 255 (4.3)       | <0.001  |
| Stroke/TIA                                | 437 (12.1)           | 189 (11.2)      | 0.361      | 401 (7.1)            | 351 (5.9)       | 0.006   |
| History of heart failure                  | 787 (21.9)           | 233 (13.8)      | <0.001     | 265 (4.7)            | 82 (1.4)        | <0.001  |
| Aspirin                                   | 2657 (82.6)          | 1093 (76.2)     | <0.001     | 2115 (42.6)          | 1163 (22.9)     | <0.001  |
| P <sub>2</sub> Y <sub>12</sub> inhibitors | 785 (25.0)           | 200 (14.3)      | <0.001     | 288 (5.8)            | 87 (1.7)        | <0.001  |
| ACE-I/ ARB                                | 1553 (69.4)          | 545 (54.9)      | 0.002      | 1523 (41.7)          | 855 (25.3)      | <0.001  |
| Beta blockers                             | 2178 (69.2)          | 760 (55.0)      | <0.001     | 1599 (33.1)          | 800 (16.1)      | <0.001  |
| Statins                                   | 2408 (77.1)          | 880 (63.8)      | <0.001     | 2096 (44.8)          | 1224 (25.7)     | <0.001  |

| Revascularization therapy           |              |              |        |              |              |        |
|-------------------------------------|--------------|--------------|--------|--------------|--------------|--------|
| Primary PCI                         | 32 (1.0)     | 916 (63.2)   | <0.001 | 112 (2.0)    | 4119 (68.7)  | <0.001 |
| Any PCI                             | 1700 (47.0)  | 1163 (68.7)  | <0.001 | 3018 (53.7)  | 4458 (74.4)  | <0.001 |
| CABG                                | 156 (4.3)    | 71 (4.2)     | 0.910  | 363 (8.2)    | 185 (4.0)    | <0.001 |
| In-hospital complications           |              |              |        |              |              |        |
| Pulmonary edema (Killip-3)          | 325 (9.0)    | 145 (8.6)    | 0.656  | 300 (5.3)    | 336 (5.6)    | 0.545  |
| Cardiogenic shock (Killip-4)        | 82 (2.3)     | 121 (7.2)    | <0.001 | 80 (1.4)     | 291 (4.9)    | <0.001 |
| Re-MI                               | 52 (1.4)     | 39 (2.3)     | 0.032  | 51 (0.9)     | 81 (1.4)     | 0.029  |
| Stent thrombosis                    | 12 (0.5)     | 25 (2.4)     | <0.001 | 5 (0.1)      | 37 (1.0)     | <0.001 |
| Free wall rupture                   | 1 (0.0)      | 6 (0.4)      | 0.008  | 3 (0.1)      | 49 (0.8)     | <0.001 |
| MR moderate – severe                | 81 (2.2)     | 41 (2.4)     | 0.758  | 101 (1.8)    | 101 (1.7)    | 0.697  |
| Sustained VT (>125 bpm)             | 50 (1.4)     | 40 (2.4)     | 0.014  | 40 (0.7)     | 118 (2.0)    | <0.00  |
| Primary VF                          | 21 (0.6)     | 59 (3.5)     | <0.001 | 21 (0.4)     | 211 (3.5)    | <0.001 |
| Acute renal failure                 | 281 (7.8)    | 125 (7.4)    | 0.650  | 275 (4.9)    | 332 (5.6)    | 0.127  |
| Treatment at discharge              |              |              |        |              |              |        |
| Aspirin                             | 3313 ( 93.7) | 1528 ( 93.7) | 0.996  | 5211 ( 94.2) | 5545 ( 95.2) | 0.022  |
| P <sub>2</sub> Y <sub>12</sub> inh. | 2486 ( 71.0) | 1172 ( 72.7) | 0.230  | 3821 ( 69.7) | 4466 ( 77.0) | <0.001 |
| Statins                             | 3088 ( 87.9) | 1370 ( 84.8) | 0.003  | 4692 ( 85.6) | 4827 ( 83.3) | 0.001  |
| ACE/ARB's                           | 2010 ( 55.6) | 958 ( 56.6)  | 0.514  | 2745 ( 48.8) | 3181 ( 53.1) | <0.001 |
| Beta blockers                       | 2860 ( 82.9) | 1287 ( 80.9) | 0.091  | 4156 ( 77.2) | 4597 ( 80.2) | <0.001 |
| Referral to cardiac rehabilitation  | 877 ( 39.8)  | 480 ( 54.5)  | <0.001 | 1492 ( 46.0) | 1824 ( 58.8) | <0.001 |
| Clinical outcome                    |              |              |        |              |              |        |

|                         |            |            |        |             |             |        |
|-------------------------|------------|------------|--------|-------------|-------------|--------|
| Re- MI/angina (30 days) | 149 (8.0)  | 84 (11.2)  | 0.012  | 174 ( 6.1)  | 185 ( 6.7)  | 0.365  |
| MACE* (30 days)         | 522 (14.6) | 330 (19.5) | <0.001 | 676 ( 12.1) | 856 ( 14.3) | <0.001 |
| 30-days mortality       | 148 (4.2)  | 143 (8.5)  | <0.001 | 165 ( 3.0)  | 352 ( 5.9)  | <0.001 |
| 1-year mortality        | 408 (11.7) | 248 (15.0) | 0.001  | 397 ( 7.2)  | 530 ( 9.0)  | <0.001 |

\*a composite of death, ACS, stroke, unstable angina, stent thrombosis, and urgent

revascularization

ACE-I-angiotensin-converting enzyme inhibitor; ARB- angiotensin receptor blocker; CABG-

coronary artery bypass graft; PCI- percutaneous coronary; PVD- peripheral vascular disease;

TIA- transient ischemic attack; MACE- major adverse cardiac events; MI- myocardial

infarction; MR- mitral regurgitation; VF- ventricular fibrillation; VT-ventricular tachycardia
