# Supplementary material for: Temporal Trends and Outcome of Patients with Acute Coronary Syndrome and Prior Myocardial Infarction
Source: MDPI journal article supplement (doi:10.3390/jcm10235580), 2021-11-27
Supplement: s1 [file s1]

**Table S2:** Baseline characteristics, clinical presentation and management of patients with and without prior MI between time periods (early 2000-2008 vs. late 2010-2018) after propensity score matching

|                                           | Prior MI        |                |         | No prior MI     |                |         |
|-------------------------------------------|-----------------|----------------|---------|-----------------|----------------|---------|
|                                           | Early<br>n=1809 | Late<br>n=1809 | P value | Early<br>n=4490 | Late<br>n=4490 | P value |
| Age (years)                               | 65.9 ±12.3      | 66.2±12.5      | 0.462   | 62.1±13.0       | 62.6±12.9      | 0.055   |
| Sex (male)                                | 1472 (81.4)     | 1460 (80.7)    | 0.641   | 3412 (76.0)     | 3387 (75.4)    | 0.555   |
| Hypertension                              | 1362 (75.3)     | 1364 (75.4)    | 0.969   | 2455 (54.7)     | 2509 (55.9)    | 0.261   |
| Dyslipidemia                              | 1516 (83.8)     | 1534 (84.8)    | 0.437   | 2827 (63.0)     | 2863 (63.8)    | 0.443   |
| Diabetes mellitus                         | 849 (46.9)      | 838 (46.3)     | 0.739   | 1410 (31.4)     | 1438 (32.0)    | 0.540   |
| Family history of CAD                     | 443 (24.5)      | 430 (23.8)     | 0.641   | 1239 (27.6)     | 1182 (26.3)    | 0.183   |
| Active smoker                             | 580 (32.1)      | 578 (32.0)     | 0.972   | 1846 (41.1)     | 1809 (40.3)    | 0.439   |
| Chronic kidney disease                    | 334 (18.5)      | 345 (19.1)     | 0.670   | 353 (7.9)       | 343 (7.6)      | 0.722   |
| History of heart failure                  | 357 (19.7)      | 335 (18.5)     | 0.375   | 133 (3.0)       | 128 (2.9)      | 0.802   |
| Prior PVD                                 | 253 (14.0)      | 255 (14.1)     | 0.962   | 200 (4.5)       | 210 (4.7)      | 0.649   |
| Prior PCI                                 | 1405 (77.7)     | 1391 (76.9)    | 0.606   | 361 (8.0)       | 376 (8.4)      | 0.590   |
| Prior CABG                                | 436 (24.1)      | 441 (24.4)     | 0.877   | 99 (2.2)        | 110 (2.4)      | 0.484   |
| <b>Prior medications</b>                  |                 |                |         |                 |                |         |
| Aspirin                                   | 1307 (85.3)     | 1372 (78.8)    | <0.001  | 1217 (32.9)     | 1389 (32.9)    | 1.000   |
| P <sub>2</sub> Y <sub>12</sub> inhibitors | 301 (19.7)      | 460 (26.8)     | <0.001  | 87 (2.3)        | 218 (5.3)      | <0.001  |
| ACE-I/ARB                                 | 376 (49.2)      | 752 (45.8)     | 0.136   | 417 (23.3)      | 973 (24.3)     | 0.398   |
| Beta blockers                             | 1003 (55.4)     | 1108 (61.2)    | <0.001  | 918 (20.4)      | 985 (21.9)     | 0.088   |
| Statins                                   | 1093 (60.4)     | 1311 (72.5)    | <0.001  | 1164 (25.9)     | 1633 (36.4)    | <0.001  |

| <b>Revascularization therapy</b>         |             |             |        |             |             |        |
|------------------------------------------|-------------|-------------|--------|-------------|-------------|--------|
| Primary PCI                              | 356 (19.7)  | 382 (21.1)  | 0.302  | 1578 (35.1) | 1726 (38.4) | 0.001  |
| Any PCI                                  | 920 (50.9)  | 1121 (62.0) | <0.001 | 2650 (59.0) | 3295 (73.4) | <0.001 |
| CABG                                     | 87 (4.8)    | 47 (2.6)    | 0.001  | 259 (5.8)   | 152 (3.4)   | <0.001 |
| <b>Treatment at discharge</b>            |             |             |        |             |             |        |
| Aspirin                                  | 1656 (93.9) | 1677 (94.5) | 0.487  | 4116 (93.7) | 4233 (96.2) | <0.001 |
| P <sub>2</sub> Y <sub>12</sub> inhibitor | 1066 (61.1) | 1527 (86.2) | <0.001 | 2769 (63.5) | 3896 (88.8) | <0.001 |
| Statins                                  | 1479 (83.8) | 1675 (95.6) | <0.001 | 3464 (79.1) | 4149 (95.5) | <0.001 |
| ACE/ARB's                                | 703 (38.9)  | 1373 (75.9) | <0.001 | 1597 (35.6) | 3323 (74.0) | <0.001 |
| Beta blockers                            | 1455 (82.6) | 1436 (83.6) | 0.453  | 3431 (78.3) | 3355 (79.9) | 0.079  |
| Referral to cardiac rehabilitation       | 294 (35.0)  | 715 (47.9)  | <0.001 | 738 (42.9)  | 2169 (58.7) | <0.001 |

ACE-I-angiotensin-converting enzyme inhibitor; ARB- angiotensin receptor blocker; CABG- coronary artery bypass graft; CAD- coronary artery disease; PCI- percutaneous coronary; PVD- peripheral vascular disease; MI-myocardial infarction.

Variables included in the model of propensity score (both the model for prior MI patients and for no prior MI patients): Age, Sex, Dyslipidemia , Hypertension , Diabetes mellitus, Chronic renal failure, History of heart failure, Prior PVD, Prior CABG, Prior PCI, current smokers, Family history of CAD.
