# Supplementary material for: Temporal Trends and Outcome of Patients with Acute Coronary Syndrome and Prior Myocardial Infarction
Source: MDPI journal article supplement (doi:10.3390/jcm10235580), 2021-11-27
Supplement: s1 [file s1]

**Table S5:** Clinical presentation and management of patients with prior MI admitted with STEMI vs NSTEMI-ACS comparing between time periods (early 2000-2008 vs late 2010-2018)

|                                  | STEMI          |               |         | NSTEMI-ACS      |                |         |
|----------------------------------|----------------|---------------|---------|-----------------|----------------|---------|
|                                  | Early<br>n=983 | Late<br>n=711 | P value | Early<br>n=1838 | Late<br>n=1780 | P value |
| <b>Revascularization therapy</b> |                |               |         |                 |                |         |
| Primary PCI                      | 534 (54.3)     | 535 (75.2)    | <0.001  | 28 (1.5)        | 4 (0.2)        | <0.001  |
| Any PCI                          | 577 (58.7)     | 586 (82.4)    | <0.001  | 748 (40.7)      | 952 (53.5)     | <0.001  |
| CABG                             | 62 (6.4)       | 9 (1.3)       | 0.334   | 94 (5.1)        | 62 (3.5)       | 0.018   |
| <b>In-hospital complications</b> |                |               |         |                 |                |         |
| Pulmonary edema (Killip-3)       | 106 (10.8)     | 39 (5.5)      | <0.001  | 214 (11.7)      | 111 (6.2)      | <0.001  |
| Cardiogenic shock (Killip-4)     | 82 (8.4)       | 39 (5.5)      | 0.029   | 54 (3.0)        | 28 (1.6)       | 0.008   |
| Re-MI                            | 31 (3.2)       | 8 (1.1)       | 0.009   | 35 (1.9)        | 17 (1.0)       | 0.022   |
| Stent thrombosis                 | 14 (4.0)       | 11 (1.5)      | 0.023   | 5 (0.6)         | 7 (0.4)        | 0.646   |
| Free wall rupture                | 5 (0.5)        | 1 (0.1)       | 0.396   | 1 (0.1)         | 0 (0.0)        | 1.000   |
| MR moderate – severe             | 33 (3.4)       | 8 (1.1)       | 0.005   | 50 (2.7)        | 31 (1.7)       | 0.058   |
| Sustained VT (>125 bpm)          | 31 (3.2)       | 9 (1.3)       | 0.018   | 27 (1.5)        | 23 (1.3)       | 0.740   |
| Primary VF                       | 41 (4.2)       | 18 (2.5)      | 0.090   | 14 (0.8)        | 7 (0.4)        | 0.211   |
| Acute renal failure              | 75 (7.7)       | 50 (7.1)      | 0.712   | 176 (9.7)       | 105 (5.9)      | <0.001  |
| <b>Treatment at discharge</b>    |                |               |         |                 |                |         |
| Aspirin                          | 871 (92.3)     | 657 (95.8)    | 0.005   | 1665 (92.4)     | 1648 (95.0)    | 0.002   |
| P2Y <sub>12</sub> inhibition     | 549 (59.2)     | 623 (90.9)    | <0.001  | 976 (55.1)      | 1510 (87.4)    | <0.001  |
| Statins                          | 724 (77.2)     | 646 (95.3)    | <0.001  | 1419 (79.3)     | 1669 (96.8)    | <0.001  |
| ACE/ARB's                        | 408 (41.5)     | 550 (77.4)    | <0.001  | 666 (36.2)      | 1344 (75.5)    | <0.001  |

|                                    |            |            |        |             |             |        |
|------------------------------------|------------|------------|--------|-------------|-------------|--------|
| Beta blockers                      | 735 (78.4) | 552 (84.7) | 0.002  | 1445 (80.6) | 1415 (85.4) | <0.001 |
| Referral to cardiac rehabilitation | 136 (44.4) | 344 (59.8) | <0.001 | 214 (28.6)  | 663 (45.5)  | <0.001 |

ACE-I-angiotensin-converting enzyme inhibitor; ARB- angiotensin receptor blocker; CABG- coronary artery bypass graft; NSTEMI-ACS- non-ST elevation acute coronary syndrome; PCI- percutaneous coronary; PVD- peripheral vascular disease; TIA- transient Ischemic attack; STEMI-ST elevation MI; MACE- major adverse cardiac events; MI- myocardial infarction; MR- mitral regurgitation; VF- ventricular fibrillation; VT-ventricular tachycardia
