# Supplementary material for: Temporal Trends and Outcome of Patients with Acute Coronary Syndrome and Prior Myocardial Infarction
Source: MDPI journal article supplement (doi:10.3390/jcm10235580), 2021-11-27
Supplement: s1 [file s1]

## Supplementary Materials:

**Table S1:** Baseline characteristics of patients with vs. without prior MI admitted with ACS (2000-2018)

|                                           | <b>No Prior MI<br/>(n=11617)</b> | <b>Prior MI<br/>(n=5317)</b> | <b>P value</b> |
|-------------------------------------------|----------------------------------|------------------------------|----------------|
| Age (years)                               | 62.6 ±13.1                       | 66.7±12.4                    | <0.001         |
| Gender (male)                             | 8757 (75.4)                      | 4316 (81.2)                  | <0.001         |
| Dyslipidemia                              | 6735 (58.2)                      | 4258 (80.1)                  | <0.001         |
| Hypertension                              | 6185 (53.4)                      | 3877 (72.9)                  | <0.001         |
| Current Smoker                            | 4613 (39.7)                      | 1701 (32.0)                  | <0.001         |
| Diabetes mellitus                         | 3641 (31.3)                      | 2465 (46.4)                  | <0.001         |
| Prior CABG                                | 410 (3.5)                        | 1251 (23.5)                  | <0.001         |
| Prior PCI                                 | 1069 (9.2)                       | 3709 (69.8)                  | <0.001         |
| Chronic kidney disease                    | 866 (7.5)                        | 983 (18.5)                   | <0.001         |
| PVD                                       | 661 (5.7)                        | 744 (14.0)                   | <0.001         |
| CVA/TIA                                   | 754 (6.5)                        | 627 (11.9)                   | <0.001         |
| <b>Baseline medications</b>               |                                  |                              |                |
| Aspirin                                   | 3279 (32.7)                      | 3753 (80.6)                  | <0.001         |
| P <sub>2</sub> Y <sub>12</sub> inhibitors | 375 (3.8)                        | 985 (21.7)                   | <0.001         |
| ACE-I/ARB                                 | 2278 (33.5)                      | 2098 (65.0)                  | <0.001         |
| Beta blockers                             | 2399 (20.7)                      | 2939 (55.3)                  | <0.001         |
| Statins                                   | 3321 (28.6)                      | 3289 (61.9)                  | <0.001         |
| <b>Presentation and management</b>        |                                  |                              |                |
| ST elevation at presentation              | 5993 (51.6)                      | 1649 (31.9)                  | <0.001         |

|                                                  |              |             |        |
|--------------------------------------------------|--------------|-------------|--------|
| Admission Killip III/IV                          | 627 (5.5)    | 460 (8.9)   | <0.001 |
| Revascularization therapy                        |              |             |        |
| Primary PCI                                      | 3808 (36.4)  | 949 (20.7)  | <0.001 |
| Any PCI                                          | 6269 (64.4)  | 2463 (53.9) | <0.001 |
| CABG                                             | 520 (4.7)    | 200 (4.3)   | 0.217  |
| Number of diseased vessels                       |              |             |        |
| 1                                                | 2868 (37.1)  | 742 (22.1)  | <0.001 |
| 2                                                | 2427 (31.4)  | 1091 (32.4) |        |
| 3                                                | 1999 (25.9)  | 1424 (42.4) |        |
| In-hospital complications                        |              |             |        |
| Pulmonary edema (Killip-3)                       | 636 (5.5)    | 474 (8.9)   | <0.001 |
| Cardiogenic shock (Killip-4)                     | 371 (3.2)    | 203 (3.8)   | 0.039  |
| Re-MI                                            | 132 (1.1)    | 91 (1.7)    | 0.003  |
| Stent thrombosis<br>(definite/probable/possible) | 42 (0.6)     | 37 (1.0)    | 0.014  |
| Free wall rupture                                | 52 (0.4)     | 7 (0.1)     | 0.002  |
| MR moderate – severe                             | 202 (1.7)    | 123 (2.3)   | 0.013  |
| Sustained VT (>125 bpm)                          | 158 (1.4)    | 90 (1.7)    | 0.106  |
| Primary VF                                       | 232 (2.0)    | 80 (1.5)    | 0.033  |
| Acute renal failure                              | 607 (5.2)    | 406 (7.7)   | <0.001 |
| Treatment at discharge                           |              |             |        |
| Aspirin                                          | 10759 (94.7) | 4845 (93.7) | 0.010  |
| P <sub>2</sub> Y <sub>12</sub> inh.              | 8289 (73.5)  | 3659 (71.5) | <0.001 |
| Statins                                          | 9525 (84.4)  | 4459 (86.9) | 0.001  |

|                                 |             |             |        |
|---------------------------------|-------------|-------------|--------|
| ACE/ARB's                       | 5926 (51.0) | 2971 (55.9) | <0.001 |
| Beta blockers                   | 8755 (78.8) | 4150 (82.3) | <0.001 |
| Cardiac rehabilitation referral | 3316 (52.2) | 1357 (44.0) | <0.001 |
| <b>Clinical outcome</b>         |             |             |        |
| Re- MI/angina (30 days)         | 359 (6.4)   | 233 (8.9)   | <0.001 |
| MACE (30 days)                  | 1532 (13.2) | 854 (16.2)  | <0.001 |
| 30-days mortality               | 517 (4.5)   | 292 (5.6)   | 0.003  |
| 1-year mortality                | 927 (8.2)   | 659 (12.8)  | <0.001 |
